# Supplementary material for: Evolutionary Stability of Small Molecular Regulatory Networks That Exhibit Near-Perfect Adaptation
Source: MDPI journal article supplement (doi:10.3390/biology12060841), 2023-06-09
Supplement: s1 [file s1]

## Supplementary Information

### *Evolutionary Stability of Small Molecular Regulatory Networks that Exhibit Near-Perfect Adaptation*

Rajat Singhania and John J. Tyson

#### **Outline:**

**Supplementary Text S1.** *A Catalogue of Mechanisms for Robust Perfect Adaptation and Near Perfect Adaptation*

**Supplementary Table S1.** The *pure* signaling motifs.

**Supplementary Table S2.** NFLB-1 topologies (1X3X3X) macro-mutate predominantly into high-scoring IFFL-1 + NFLB-1 topologies (1X3X31).

**Supplementary Table S3.** NFLB-3 topologies (XXX331) macro-mutate predominantly into high-scoring IFFL-1 + NFLB-1 topologies (1X3X31).

**Supplementary Table S4.** NFLB-2 topologies (3X1X3X) macro-mutate predominantly to high-scoring IFFL-1 + NFLB-1 topologies (1X3X31).

**Supplementary Table S5.** NFLB-4 topologies (XXX133) macro-mutate predominantly to high-scoring IFFL-1 + NFLB-1 topologies (1X3X31).

**Supplementary Table S6.** The percentage change in average score  $\langle Z \rangle$  going from an *uncoupled* NFLB-1 topology to a coupled NFLB-1 + IFFL-1 topology.

**Supplementary Table S7.** The percentage change in average score  $\langle Z \rangle$  going from an *uncoupled* NFLB-2 topology to a coupled NFLB-2 + IFFL-4 topology.

**Supplementary Table S8.** The percentage change in average score  $\langle Z \rangle$  going from an *uncoupled* NFLB-3 topology to a coupled NFLB-3 + IFFL-1 topology.

**Supplementary Table S9.** The percentage change in average score  $\langle Z \rangle$  going from an *uncoupled* NFLB-4 topology to a coupled NFLB-4 + IFFL-4 topology.

**Supplementary Table S10.** The percentage changes in average score  $\langle Z \rangle$  going from an *uncoupled* IFFL-1 topology to a coupled IFFL-1 + NFLB-1 topology.

**Supplementary Table S11.** The percentage changes in average score  $\langle Z \rangle$  going from an *uncoupled* IFFL-1 topology to a coupled IFFL-1 + NFLB-3 topology.

**Supplementary Table S12.** The percentage changes in average score  $\langle Z \rangle$  going from an *uncoupled* IFFL-1 topology to a coupled IFFL-1 + NFLB-1 + NFLB-3 topology.

**Supplementary Table S13.** The percentage changes in average score  $\langle Z \rangle$  adding an NFLB-3 topology to a coupled IFFL-1 + NFLB-1 topology.

**Supplementary Table S14.** The percentage changes in average score  $\langle Z \rangle$  adding an NFLB-1 topology to a coupled IFFL-1 + NFLB-3 topology.

**Supplementary Table S15.** The percentage changes in average score  $\langle Z \rangle$  going from an *uncoupled* IFFL-4 topology to a coupled IFFL-4 + NFLB-2 topology.

**Supplementary Table S16.** The percentage changes in average score  $\langle Z \rangle$  going from an *uncoupled* IFFL-4 topology to a coupled IFFL-4 + NFLB-4 topology.

**Supplementary Table S17.** The percentage changes in average score  $\langle Z \rangle$  going from an *uncoupled* IFFL-4 topology to a coupled IFFL-4 + NFLB-2 + NFLB-4 topology.

**Supplementary Table S18.** The percentage changes in average score  $\langle Z \rangle$  adding an NFLB-4 topology to a coupled IFFL-4 + NFLB-2 topology.

**Supplementary Table S19.** The percentage changes in average score  $\langle Z \rangle$  adding an NFLB-2 topology to a coupled IFFL-4 + NFLB-4 topology.

**Supplementary Table S20.** Mean values of the six interaction coefficients from all high-scoring samples of IFFL-1 topologies.

**Supplementary Table S21.** Mean values of the six interaction coefficients from all high-scoring samples of IFFL-4 topologies.

## Supplementary Text S1. *A Catalogue of Mechanisms for Robust Perfect Adaptation and Near Perfect Adaptation*

Each motif is displayed as a reaction network among four species: S, P, Q and R; where S is the ‘signal’ and R is the ‘response’. (In some cases, P and R are combined into one species.) For robust perfect adaptation (RPA), the steady-state concentration of R (i.e.,  $R_{ss}$ ) is independent of the signal strength  $S$ , regardless of the kinetic parameter values (provided there exists a steady state solution with all positive concentrations). For near-perfect adaptation (NPA),  $R_{ss}$  depends only weakly of  $S$ . For many proposed mechanisms, RPA depends on an assumption that particular chemical reactions proceed at a constant rate, independent of the concentration of the reactant. These reactions are indicated by the symbol ( $\circ\rightarrow$ ), and the constant rate of the reaction is denoted by  $V$ . For the ‘standard’ reactions in the motifs (symbolized by  $\rightarrow$ ), the reaction rates are given by the law of mass action, with positive rate constants  $k_i$ . The role of the ‘signal’ is often expressed by an arbitrary, monotone increasing function  $F(S)$ ; e.g.,  $1+S$ , or  $\frac{S}{1+S}$ , or  $\frac{S^n}{1+S^n}$ . In cases where Q inhibits a reaction, the rate of the reaction is multiplied by  $\frac{1}{1+Q}$ , but other monotone decreasing functions would work equally well. In motif #6 below, the T-shaped reaction arrow indicates reversible binding of  $P + R$  to yield the complex Q, with forward rate constant  $k_{3f}$  and reverse rate constant  $k_{3r}$ . The Y-shaped connector in motif #11 denotes irreversible binding.

| # | Mechanism | Differential Equations                                                                                                           | Steady-State                                                                                                            | References                                 |
|---|-----------|----------------------------------------------------------------------------------------------------------------------------------|-------------------------------------------------------------------------------------------------------------------------|--------------------------------------------|
| 1 |           | $\frac{dP}{dt} = k_1SR - k_2P + (1 - \alpha)V_3$ $\frac{dQ}{dt} = k_4R - V_3$ $\frac{dR}{dt} = \alpha V_3 + k_2P - k_1SR - k_4R$ | $P = \frac{V_3}{k_2} \left( 1 - \alpha + \frac{k_1S}{k_4} \right)$ $R = \frac{V_3}{k_4}$ $P + Q + R = \text{const} > 0$ | Barkai & Leibler (1997)<br>Khammash (2021) |
| 2 |           | $\frac{dQ}{dt} = k_3R - V_4$ $\frac{dR}{dt} = \frac{k_1F(S)}{1+Q} - k_2R - k_3R$                                                 | $1 + Q = \frac{k_3k_1F(S)}{V_4(k_2 + k_3)} > 1$ $R = \frac{V_4}{k_3}$                                                   | Yi et al. (2000)<br>“integral feedback”    |

|   |                                                                                     |                                                                                                                   |                                                                                                             |                                              |
|---|-------------------------------------------------------------------------------------|-------------------------------------------------------------------------------------------------------------------|-------------------------------------------------------------------------------------------------------------|----------------------------------------------|
| 3 | 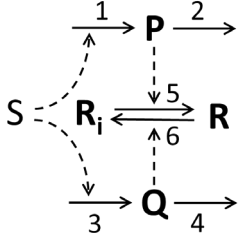   | $\frac{dP}{dt} = k_1 F(S) - k_2 P$ $\frac{dQ}{dt} = k_3 F(S) - k_4 Q$ $\frac{dR}{dt} = k_5 P(R_T - R) - k_6 QR$   | $P = \frac{k_1 F(S)}{k_2}$ $Q = \frac{k_3 F(S)}{k_4}$ $R = \frac{R_T}{1 + \frac{k_2 k_3 k_6}{k_1 k_4 k_5}}$ | Levchenko & Iglesias (2002)                  |
| 4 |    | $\frac{dQ}{dt} = k_1 F(S) - k_2 Q$ $\frac{dR}{dt} = k_3 F(S) - k_4 QR$                                            | $Q = \frac{k_1 F(S)}{k_2}$ $R = \frac{k_2 k_3}{k_1 k_4}$                                                    | Tyson et al. (2003) (Fig. 1d)<br>"Sniffer"   |
| 5 |   | $\frac{dP}{dt} = k_1 S Q - k_2 P - k_3 R P$ $\frac{dQ}{dt} = k_0 - k_1 S Q + k_2 P$ $\frac{dR}{dt} = k_4 P - V_5$ | $P = \frac{V_5}{k_4}$ $Q = \frac{k_0 k_4 + k_2 V_5}{k_4 k_1 S}$ $R = \frac{k_0 k_4}{k_3 V_5}$               | Behar et al. (2007) (Model IVA)              |
| 6 |  | $\frac{dP}{dt} = k_0 - k_1 F(S) P + k_2 R$ $\frac{dR}{dt} = k_1 F(S) P - k_2 R - k_3 R$                           | $P = \frac{k_0 (k_2 + k_3)}{k_3 k_1 F(S)}$ $R = \frac{k_0}{k_3}$                                            | Hao et al. (2007)<br>Drengstig et al. (2008) |
| 7 |  | $\frac{dQ}{dt} = k_1 - k_2 F(S) Q + k_3 R$ $\frac{dR}{dt} = k_2 F(S) Q - k_3 R - k_4 R$                           | $Q = \frac{k_1}{k_2 F(S)} \left( 1 + \frac{k_3}{k_4} \right)$ $R = \frac{k_1}{k_4}$                         | Francois & Siggia (2008) (Fig. 4)            |

8

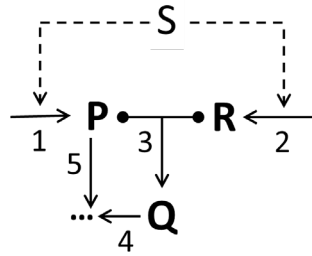

$$\begin{aligned}\frac{dP}{dt} &= k_1 F(S) - k_{3f}PR + k_{3r}Q - k_5P \\ \frac{dQ}{dt} &= k_{3f}PR - k_{3r}Q - k_4Q \\ \frac{dR}{dt} &= k_2 F(S) - k_{3f}PR + k_{3r}Q\end{aligned}$$

$$\begin{aligned}P &= \frac{(k_1 - k_2)F(S)}{k_5} \\ Q &= \frac{k_2 F(S)}{k_4} \\ R &= \frac{k_2 k_5 (k_{3r} + k_4)}{k_4 (k_1 - k_2) k_{3f}}\end{aligned}$$

Francois &  
Siggia (2008)  
(Fig. 7)

9

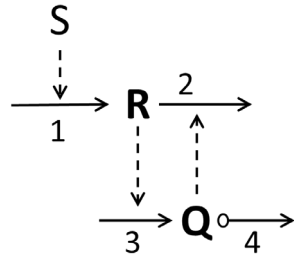

$$\begin{aligned}\frac{dQ}{dt} &= k_3 R - V_4 \\ \frac{dR}{dt} &= k_1 F(S) - k_2 Q R\end{aligned}$$

$$\begin{aligned}Q &= \frac{k_1 F(S)}{k_2} \cdot \frac{k_3}{V_4} \\ R &= \frac{V_4}{k_3}\end{aligned}$$

Behar et al.  
(2007)  
(Model I)

Ni et al.  
(2009)  
(Fig. 6a)

10

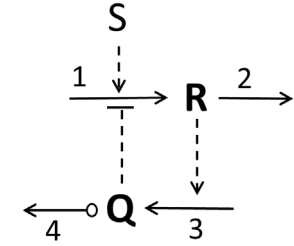

$$\begin{aligned}\frac{dQ}{dt} &= k_3 R - V_4 \\ \frac{dR}{dt} &= \frac{k_1 F(S)}{1 + Q} - k_2 R\end{aligned}$$

$$\begin{aligned}1 + Q &= \frac{k_1 F(S)}{k_2} \cdot \frac{k_3}{V_4} > 1 \\ R &= \frac{V_4}{k_3}\end{aligned}$$

Ni et al.  
(2009)  
(Fig. 6b)

11

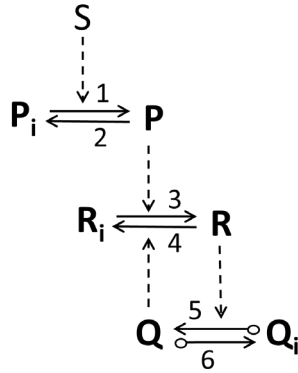

$$\begin{aligned}\frac{dP}{dt} &= k_1 S(1 - P) - k_2 P \\ \frac{dQ}{dt} &= k_5 R - k_6 \\ \frac{dR}{dt} &= k_3 P(1 - R) - k_4 Q R\end{aligned}$$

$$\begin{aligned}P &= \frac{k_1 S}{k_1 S + k_2} \\ Q &= \frac{k_3 (k_5 - k_6)}{k_4 k_6} \left( \frac{k_1 S}{k_1 S + k_2} \right) \\ R &= \frac{k_6}{k_5} < 1\end{aligned}$$

Ma et al.  
(2009)  
(Fig. 3a)

“negative  
feedback  
loop with  
buffer”

12

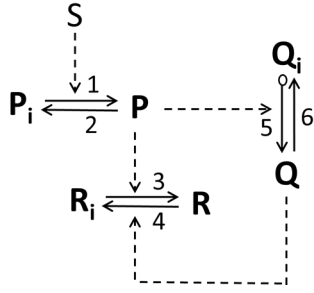

$$\frac{dP}{dt} = k_1 S(1 - P) - k_2 P$$

$$\frac{dQ}{dt} = k_5 P - k_6 Q$$

$$\frac{dR}{dt} = k_3 P(1 - R) - k_4 QR$$

$$P = \frac{k_1 S}{k_1 S + k_2}$$

$$Q = \frac{k_5}{k_6} \left( \frac{k_1 S}{k_1 S + k_2} \right)$$

$$R = \frac{1}{1 + \frac{k_4 k_5}{k_3 k_6}}$$

Ma et al.  
(2009)  
(Fig. 3b)  
“incoherent  
feedforward  
loop”

13

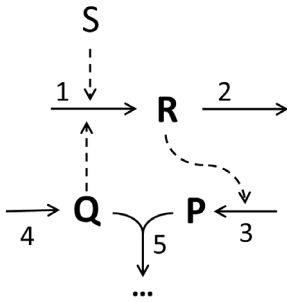

$$\frac{dP}{dt} = k_3 R - k_5 PQ$$

$$\frac{dQ}{dt} = k_4 - k_5 PQ$$

$$\frac{dR}{dt} = k_1 QS - k_2 R$$

$$P = \frac{k_1 k_3 S}{k_2 k_5}$$

$$Q = \frac{k_2 k_4}{k_3 k_1 S}$$

$$R = \frac{k_4}{k_3}$$

Briat et al.  
(2016)  
“N-type  
antithetic”

14

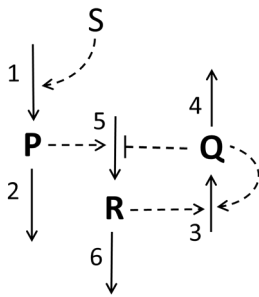

$$\frac{dP}{dt} = k_1 S - k_2 P$$

$$\frac{dQ}{dt} = k_3 QR - k_4 Q$$

$$\frac{dR}{dt} = \frac{k_5 P}{1 + Q} - k_6 R$$

$$P = \frac{k_1 S}{k_2}$$

$$1 + Q = \frac{k_1 k_3 k_5 S}{k_2 k_4 k_6} > 1$$

$$R = \frac{k_4}{k_3}$$

Shi et al.  
(2017)  
“negative  
feedback  
loop with  
exponential  
buffer”

15

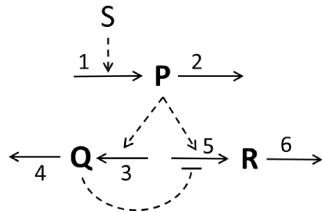

$$\frac{dP}{dt} = k_1 S - k_2 P$$

$$\frac{dQ}{dt} = k_3 \left( \frac{P}{K_3} \right)^{m_3} - k_4 Q$$

$$\frac{dR}{dt} = k_5 \left( \frac{P}{K_5} \right)^{m_5} \left( \frac{L_5}{Q} \right)^{n_5} - k_6 R$$

$$P = \frac{k_1 S}{k_2} \ll K_3, K_5$$

$$Q = \frac{k_3}{k_4} \left( \frac{k_1 S}{k_2 K_3} \right)^{m_3} \gg L_5$$

$$R = \frac{k_5}{k_6} \left( \frac{k_4 L_5}{k_3} \right)^{n_5} \frac{K_3^{m_3 n_5}}{K_5^{m_5}} \left( \frac{k_1 S}{k_2} \right)^{m_5 - m_3 n_5}$$

RPA if  $m_3 n_5 = m_5$

Shi et al.  
(2017)  
“incoherent  
feedforward  
loop”

**Supplementary Table S1.** The *pure* signaling motifs.<sup>a</sup>

| Sign Pattern                              | Motif                                                                                                                                                                   | Eight distinct cases                                                                                                             | Name                     |
|-------------------------------------------|-------------------------------------------------------------------------------------------------------------------------------------------------------------------------|----------------------------------------------------------------------------------------------------------------------------------|--------------------------|
| $0\ 0\pm 0\pm\pm$                         | 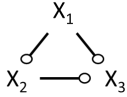                                                                                       | $(++-), (+-+), (-++), (---)$<br>$(--+), (-+-), (+--), (+++)$                                                                     | IFFL<br>CFFL             |
| $\pm 0\pm 0\pm 0$                         |                                                                                        | $(+-+), (+--), (-++), (-+-)$<br>$(+++), (++-), (--+), (---)$                                                                     | NFLB/upper<br>PFLB/upper |
| $0\ 0\ 0\pm\pm\pm$                        |                                                                                        | $(++-), (+--), (-++), (---)$<br>$(+++), (+-+), (-+-), (---)$                                                                     | NFLB/lower<br>PFLB/lower |
| $0\pm\pm 0\ 0\pm$                         |                                                                                        | $(++-), (+-+), (-++), (---)$<br>$(+-+), (-+-), (---), (+++)$                                                                     | NFL/ccw<br>PFL/ccw       |
| $\pm 0\ 0\pm\pm 0$                        |                                                                                        | $(++-), (+-+), (-++), (---)$<br>$(+-+), (-+-), (---), (+++)$                                                                     | NFL/cw<br>PFL/cw         |
| Sign Pattern                              | Motifs                                                                                                                                                                  | Explanatory Notes                                                                                                                |                          |
| $\pm\pm 0\ 0\pm 0$<br>$0\pm\pm 0\pm 0$    |     | Output node feeds back directly to input node. Regulatory node ineffective. Non-adaptive networks, according to Ma et al. (2009) |                          |
| $0\pm 0\pm\pm 0$<br>$0\pm 0\ 0\pm\pm$     |   |                                                                                                                                  |                          |
| $\pm 0\pm 0\ 0\pm$<br>$0\ 0\pm\pm 0\pm$   |   | Non-adaptive: regulatory node does not buffer the signal.                                                                        |                          |
| $\pm 0\ 0\ 0\pm\pm$<br>$0\ 0\pm\pm 0\pm$  |   | Non-adaptive: the output node receives direct influence from input node, but no corrective action from regulatory node.          |                          |
| $0\pm\pm\pm 0\ 0$<br>$\pm\pm 0\pm 0\ 0$   |   | Non-adaptive: the output node receives no influence, directly or indirectly, from input node. Therefore, no response to signal.  |                          |
| $\pm\pm 0\ 0\ 0\pm$                       |                                                                                      |                                                                                                                                  |                          |
| $\pm\pm\pm 0\ 0\ 0$<br>$\pm 0\pm\pm 0\ 0$ |   |                                                                                                                                  |                          |
| $\pm 0\ 0\pm 0\pm$<br>$0\pm 0\pm 0\pm$    |   |                                                                                                                                  |                          |

<sup>a</sup> **Notes:** For a molecular interaction network with three links among three genes and/or proteins there are  $6\text{-choose-}3 = 20$  different sign patterns with three 0's and three  $\pm$ 's, listed here. The sign patterns are translated into a motif diagram, where the connector ( $j \rightarrow i$ ) indicates that species  $j$  either activates or inhibits species  $i$  ( $s_{ij} = \text{sign}(w_{ij}) = +$  for activation,  $-$  for inhibition). The first five sign patterns are potentially adaptive motifs, with common names: IFFL, incoherent feedforward loop; CFFL, coherent feedforward loop; NFLB, negative feedback loop with buffer node; PFLB, positive feedback loop with buffer node; NFL, three-component negative feedback loop; PFL, three-component positive feedback loop; ccw, counterclockwise; cw, clockwise. The remaining 15 sign patterns are thought to be non-adaptive for the reasons given. In addition, CFFLs and PFLBs do not adapt on their own.



**Supplementary Table S2.** NFLB-1 topologies (1X3X3X) macro-mutate predominantly into high-scoring IFFL-1 + NFLB-1 topologies (1X3X31).

| NFLB-1<br>Topologies | IFFL-1 + NFLB-1 topologies |        |        |              |              |              |              |              |              |        |
|----------------------|----------------------------|--------|--------|--------------|--------------|--------------|--------------|--------------|--------------|--------|
|                      | 113131                     | 113231 | 113331 | 123131       | 123231       | 123331       | 133131       | 133231       | 133331       | Others |
| 113132               | 0                          | 0      | 0.001  | 0            | <b>0.954</b> | 0.024        | 0.001        | 0.009        | 0.004        | 0.006  |
| 113133               | 0                          | 0.004  | 0.001  | 0            | <b>0.957</b> | 0.008        | 0            | 0.022        | 0.001        | 0.007  |
| 113232               | 0                          | 0      | 0      | 0            | 0.006        | <b>0.385</b> | 0            | <b>0.329</b> | <b>0.277</b> | 0.004  |
| 113233               | 0                          | 0.001  | 0.002  | 0.001        | <b>0.651</b> | <b>0.331</b> | 0            | 0.007        | 0            | 0.006  |
| 113332               | NA                         | NA     | NA     | NA           | NA           | NA           | NA           | NA           | NA           | NA     |
| 113333               | 0                          | 0      | 0      | 0.010        | 0.110        | 0.108        | 0.000        | 0.018        | <b>0.754</b> | 0      |
| 123132               | 0                          | 0      | 0      | 0            | 0.055        | 0.010        | 0.001        | 0.015        | <b>0.917</b> | 0.001  |
| 123133               | 0.001                      | 0.007  | 0      | <b>0.459</b> | <b>0.214</b> | 0.011        | 0.043        | <b>0.161</b> | 0.097        | 0.007  |
| <i>123232</i>        | 0                          | 0      | 0      | 0.005        | <b>0.189</b> | 0.008        | 0.001        | <b>0.788</b> | 0.006        | 0.005  |
| 123233               | 0                          | 0      | 0      | 0.001        | <b>0.321</b> | 0.019        | 0.001        | <b>0.652</b> | 0.007        | 0      |
| 123332               | 0                          | 0      | 0.000  | 0.001        | <b>0.210</b> | <b>0.352</b> | 0.001        | 0.004        | <b>0.431</b> | 0      |
| 123333               | 0                          | 0      | 0      | 0.001        | <b>0.976</b> | 0.015        | 0            | 0.007        | 0.002        | 0      |
| 133132               | 0                          | 0      | 0.002  | 0.005        | 0.020        | <b>0.359</b> | 0            | 0.106        | <b>0.505</b> | 0.002  |
| 133133               | 0.001                      | 0      | 0      | <b>0.471</b> | 0.003        | 0            | <b>0.476</b> | 0.030        | 0.014        | 0.005  |
| 133232               | 0                          | 0      | 0      | 0            | 0.003        | 0.004        | 0.002        | <b>0.543</b> | <b>0.447</b> | 0      |
| 133233               | NA                         | NA     | NA     | NA           | NA           | NA           | NA           | NA           | NA           | NA     |
| 133332               | 0                          | 0.000  | 0.000  | 0.001        | <b>0.320</b> | <b>0.280</b> | 0.000        | <b>0.393</b> | 0.004        | 0.001  |
| 133333               | 0                          | 0      | 0      | 0.000        | <b>0.278</b> | <b>0.346</b> | 0            | <b>0.206</b> | <b>0.169</b> | 0      |

The *pure* NFLB-1 (123232) is marked in *italics*. Bold percentages indicate cases where an IFFL-1 + NFLB-1 topology occupies more than 15% of the high-scoring sample in a macro-mutation run. Percentages bordered in red indicate cases where a topology occupies more than 50% of the high-scoring sample. NA means no high-scoring topologies were found.

**Supplementary Table S3.** NFLB-3 topologies (XXX331) macro-mutate predominantly into high-scoring IFFL-1 + NFLB-1 topologies (1X3X31).

| NFLB-3<br>Topologies | <u>IFFL-1 + NFLB-1 Topologies</u> |        |              |        |              |        |        |              |              |                          |
|----------------------|-----------------------------------|--------|--------------|--------|--------------|--------|--------|--------------|--------------|--------------------------|
|                      | 113131                            | 113231 | 113331       | 123131 | 123231       | 123331 | 133131 | 133231       | 133331       | Others                   |
| 111331               | 0.001                             | 0.004  | <b>0.564</b> | 0      | <b>0.372</b> | 0.047  | 0      | 0.007        | 0            | 0.005                    |
| 112331               | 0                                 | 0      | 0.009        | 0      |              |        | 0.001  | 0.007        | 0.005        | 0.006                    |
| 121331               | 0                                 | 0.001  | 0            | 0.005  |              |        | 0      | 0.006        | 0            | 0.007                    |
| 122331               | 0                                 | 0      | 0.002        | 0      | 0.038        |        | 0      | 0            | 0.006        | 0.006                    |
| 131331               | 0                                 | 0      | 0            | 0.001  | 0.031        |        | 0      | 0            | 0.006        | 0.005                    |
| 132331               | 0                                 | 0.001  | 0.002        | 0.001  | 0.031        |        | 0.001  | 0.001        | <b>0.247</b> | 0.025                    |
| 211331               | 0                                 | 0      | 0            | 0      | 0            | 0.003  | 0      | <b>0.409</b> | <b>0.588</b> | 0                        |
| 212331               | 0                                 | 0.003  | 0            | 0.001  | 0.001        | 0.002  | 0.001  | 0            | 0            | <b>0.992<sup>a</sup></b> |
| 221331               | 0                                 | 0.003  | 0            | 0.001  | 0.109        |        | 0      | 0.001        | 0.005        | 0.005                    |
| 222331               | 0                                 | 0      | 0            | 0.002  | 0.004        |        | 0      | 0.001        | 0.005        | 0.001                    |
| 231331               | 0                                 | 0.002  | 0            | 0      |              | 0.029  | 0      | 0.006        | 0.002        | 0.002                    |
| 232331               | 0                                 | 0.003  | 0.001        | 0      | 0.012        | 0.008  | 0      | 0.021        |              | 0.003                    |
| 312331               | 0                                 | 0      | 0            | 0      | 0.006        | 0.006  | 0.002  |              |              | 0.002                    |
| 322331               | 0                                 | 0.001  | 0.003        | 0.007  | 0.028        |        | 0      | 0.042        | 0.005        | 0.002                    |
| 332331               | 0.001                             | 0.004  | 0            | 0      |              |        | 0      | <b>0.429</b> | 0.003        | 0.013                    |

The *pure* NFLB-3 (222331) is marked in *italics*. Bold percentages indicate cases where an IFFL-1 + NFLB-1 topology occupies more than 15% of the high-scoring sample in a macro-mutation run. Percentages bordered in red indicate cases where a topology occupies more than 50% of the high-scoring sample. NA means no high-scoring topologies were found.

<sup>a</sup>In this case, the predominant endpoints are IFFL-1 only (213231, 223231, 323231) and IFFL-1 + NFLB-3 (323331 and 333331).

**Supplementary Table S4.** NFLB-2 topologies (3X1X3X) macro-mutate predominantly to high-scoring IFFL-1 + NFLB-1 topologies (1X3X31). *Italic*: the *pure* NFLB-2 (321232); **bold**: more than 15% of cases in an IFFL-1 + NFLB-1 topology. NA means no high-scoring topologies were found.

| NFLB-2        | IFFL-1 + NFLB-1 Topologies |              |              |              |              |              |        |              |              |                          |
|---------------|----------------------------|--------------|--------------|--------------|--------------|--------------|--------|--------------|--------------|--------------------------|
| Topologies    | 113131                     | 113231       | 113331       | 123131       | 123231       | 123331       | 133131 | 133231       | 133331       | Others                   |
| 311131        | 0                          | 0.005        | <b>0.317</b> |              |              | 0.045        | 0      | 0.003        | 0            | 0.011                    |
| 311132        | 0.001                      | 0            | 0            |              | 0.015        | 0.002        | 0.117  | 0.005        | 0.004        | 0.016                    |
| 311231        | 0.001                      | 0            | 0            | 0.128        | 0.015        | 0.002        | 0      | 0.002        | 0            | <b>0.853<sup>a</sup></b> |
| 311232        | 0                          | 0            | 0            | 0            | 0.017        | <b>0.326</b> | 0      | 0.010        | <b>0.646</b> | 0.002                    |
| 311331        | 0                          | 0.001        | 0            | 0            | 0.006        | 0            | 0.003  | <b>0.946</b> | 0.011        | 0.033                    |
| 311332        | NA                         | NA           | NA           | NA           | NA           | NA           | NA     | NA           | NA           | NA                       |
| 321131        | 0.001                      | 0.006        | 0.004        | 0            | <b>0.399</b> | <b>0.578</b> | 0      | 0.001        | 0.004        | 0.008                    |
| 321132        | NA                         | NA           | NA           | NA           | NA           | NA           | NA     | NA           | NA           | NA                       |
| 321231        | NA                         | NA           | NA           | NA           | NA           | NA           | NA     | NA           | NA           | NA                       |
| <i>321232</i> | 0                          | 0            | 0            | 0            | 0            | 0            | 0      | 0            | 0            | <b>1.000<sup>b</sup></b> |
| 321331        | 0                          | 0.001        | 0.002        | 0.013        | <b>0.293</b> | <b>0.682</b> | 0      | 0.001        | 0.001        | 0.007                    |
| 321332        | 0.005                      | 0.003        | 0            | 0.016        | <b>0.635</b> | <b>0.328</b> | 0      | 0.003        | 0.003        | 0.006                    |
| 331131        | <b>0.527</b>               | 0.003        | 0.005        | <b>0.448</b> | 0.005        | 0.002        | 0.003  | 0.002        | 0            | 0.005                    |
| 331132        | 0                          | 0.004        | <b>0.501</b> | 0.001        | 0.116        | <b>0.331</b> | 0      | 0            | 0.037        | 0.009                    |
| 331231        | 0.002                      | <b>0.220</b> | 0.002        | 0            | 0.005        | 0.008        | 0.001  | <b>0.230</b> | <b>0.520</b> | 0.011                    |
| 331232        | NA                         | NA           | NA           | NA           | NA           | NA           | NA     | NA           | NA           | NA                       |
| 331331        | NA                         | NA           | NA           | NA           | NA           | NA           | NA     | NA           | NA           | NA                       |
| 331332        | 0                          | 0.001        | 0            | 0            | <b>0.973</b> | 0.004        | 0      | 0.018        | 0            | 0.005                    |

<sup>a</sup>The dominant topologies in this case are *uncoupled* NFLB-1: 133232, 123232 and 123132.

<sup>b</sup>The dominant topologies in this case are IFFL-4 + NFLB-2: 331333, 321233 and 321133.

**Supplementary Table S5.** NFLB-4 topologies (XXX133) macro-mutate predominantly to high-scoring IFFL-1 + NFLB-1 topologies (1X3X31). *Italic*: the *pure* NFLB-2 (321232); **bold**: more than 15% of cases in an IFFL-1 + NFLB-1 topology. NA means no high-scoring topologies were found.

| NFLB-4<br>Topologies | IFFL-1 + NFLB-1 Topologies |        |        |              |              |              |              |              |              |                          |
|----------------------|----------------------------|--------|--------|--------------|--------------|--------------|--------------|--------------|--------------|--------------------------|
|                      | 113131                     | 113231 | 113331 | 123131       | 123231       | 123331       | 133131       | 133231       | 133331       | Others                   |
| 112133               | 0                          | 0      | 0      | 0            | 0            | 0.003        | 0            | 0.008        | <b>0.989</b> | 0                        |
| 122133               | 0                          | 0      | 0      | 0            | 0.015        | 0.001        | 0            | <b>0.974</b> | 0.009        | 0.001                    |
| 132133               | 0                          | 0      | 0.001  | 0.004        | <b>0.878</b> | 0.006        | 0            | 0.007        | 0.004        | 0.101                    |
| 212133               | 0                          | 0      | 0      | 0.003        | 0.096        | 0.004        | 0            | 0.001        | 0            | <b>0.896<sup>a</sup></b> |
| 213133               | 0.005                      | 0      | 0      | <b>0.644</b> | <b>0.329</b> | 0.005        | 0.011        | 0.003        | 0.002        | 0.003                    |
| 223133               | NA                         | NA     | NA     | NA           | NA           | NA           | NA           | NA           | NA           | NA                       |
| 222133               | 0                          | 0      | 0      | 0            | 0            | 0            | 0            | 0            | 0            | <b>1.000<sup>b</sup></b> |
| 232133               | 0                          | 0.003  | 0.051  | 0            | <b>0.436</b> | <b>0.503</b> | 0            | 0.001        | 0.006        | 0                        |
| 233133               | 0                          | 0      | 0      | 0.063        | 0            | 0.003        | <b>0.905</b> | 0.018        | 0.003        | 0.010                    |
| 312133               | 0                          | 0      | 0      | 0            | 0.006        | 0.014        | 0            | <b>0.250</b> | <b>0.729</b> | 0.001                    |
| 313133               | 0                          | 0      | 0      | 0            | 0.007        | 0.003        | <b>0.254</b> | <b>0.707</b> | 0.026        | 0.002                    |
| 322133               | 0.001                      | 0.004  | 0.001  | 0            | <b>0.476</b> | 0.001        | 0.001        | <b>0.198</b> | <b>0.313</b> | 0.005                    |
| 323133               | 0                          | 0      | 0      | 0            | 0            | 0.013        | 0            | 0.008        | <b>0.975</b> | 0.004                    |
| 332133               | 0                          | 0      | 0      | 0.001        | 0.013        | 0.119        | 0            | <b>0.533</b> | <b>0.331</b> | 0.003                    |
| 333133               | 0                          | 0      | 0.001  | 0.002        | <b>0.606</b> | <b>0.377</b> | 0            | 0.005        | 0.007        | 0.002                    |

<sup>a</sup>The dominant topologies in this case are *uncoupled* NFLB-1: 123332 and 123232.

<sup>b</sup>The dominant topologies in this case are IFFL-4 + NFLB-2: 331133 and 321133.

**Supplementary Table S6.** The percentage change in average score  $\langle Z \rangle$  going from an *uncoupled* NFLB-1 topology to a coupled NFLB-1 + IFFL-1 topology. Note: the last digit changes to 1 in each case. The average change overall is +52%.

| NFLB-1 only |                     | NFLB-1 + IFFL-1 |                     | Percentage<br>Change |
|-------------|---------------------|-----------------|---------------------|----------------------|
| Code        | $\langle Z \rangle$ | Code            | $\langle Z \rangle$ |                      |
| 113132      | 9.35                | 113131          | 16.87               | 80                   |
| 113133      | 8.63                | 113131          | 16.87               | 95                   |
| 113232      | 10.32               | 113231          | 16.26               | 58                   |
| 113233      | 8.73                | 113231          | 16.26               | 86                   |
| 113332      | 10.69               | 113331          | 16.10               | 51                   |
| 113333      | 8.97                | 113331          | 16.10               | 79                   |
| 123132      | 12.06               | 123131          | 16.92               | 40                   |
| 123133      | 10.46               | 123131          | 16.92               | 62                   |
| 123232      | 9.80                | 123231          | 17.15               | 75                   |
| 123233      | 10.55               | 123231          | 17.15               | 63                   |
| 123332      | 12.29               | 123331          | 16.76               | 36                   |
| 123333      | 10.71               | 123331          | 16.76               | 56                   |
| 133132      | 15.40               | 133131          | 17.68               | 15                   |
| 133133      | 13.20               | 133131          | 17.68               | 34                   |
| 133232      | 15.00               | 133231          | 17.03               | 14                   |
| 133233      | 12.48               | 133231          | 17.03               | 36                   |
| 133332      | 14.29               | 133331          | 16.77               | 17                   |
| 133333      | 11.99               | 133331          | 16.77               | 40                   |

**Supplementary Table S7.** The percentage change in average score  $\langle Z \rangle$  going from an *uncoupled* NFLB-2 topology to a coupled NFLB-2 + IFFL-4 topology. Note: the last digit changes to 3 in each case. The average change overall is +240%.

| NFLB-2 only<br>Code | $\langle Z \rangle$ | NFLB-2 + IFFL-4<br>Code | $\langle Z \rangle$ | Percentage<br>Change |
|---------------------|---------------------|-------------------------|---------------------|----------------------|
| 311131              | 1.64                | 311133                  | 13.64               | 732                  |
| 311132              | 6.23                | 311133                  | 13.64               | 119                  |
| 311231              | 4.55                | 311233                  | 10.4                | 129                  |
| 311232              | 4.74                | 311233                  | 10.4                | 119                  |
| 311331              | 2.79                | 311333                  | 11.81               | 323                  |
| 311332              | 4.3                 | 311333                  | 11.81               | 175                  |
| 321131              | 1.33                | 321133                  | 12.94               | 873                  |
| 321132              | 7.39                | 321133                  | 12.94               | 75                   |
| 321231              | 5.09                | 321233                  | 12.9                | 153                  |
| 321232              | 7.1                 | 321233                  | 12.9                | 82                   |
| 321331              | 4.55                | 321333                  | 12.53               | 175                  |
| 321332              | 4.42                | 321333                  | 12.53               | 183                  |
| 331131              | 4.73                | 331133                  | 12.55               | 165                  |
| 331132              | 7.58                | 331133                  | 12.55               | 66                   |
| 331231              | 4.76                | 331233                  | 14.36               | 202                  |
| 331232              | 4.78                | 331233                  | 14.36               | 200                  |
| 331331              | 2.8                 | 331333                  | 14.34               | 412                  |
| 331332              | 8.2                 | 331333                  | 14.34               | 75                   |

**Supplementary Table S8.** The percentage change in average score  $\langle Z \rangle$  going from an *uncoupled* NFLB-3 topology to a coupled NFLB-3 + IFFL-1 topology. Note: the third digit changes to 3 in each case. The average change overall is +290%.

| NFLB-3 only<br>Code | $\langle Z \rangle$ | NFLB-3 + IFFL-1<br>Code | $\langle Z \rangle$ | Percentage<br>Change |
|---------------------|---------------------|-------------------------|---------------------|----------------------|
| 111331              | 2.13                | 113331                  | 16.1                | 656                  |
| 112331              | 5.05                | 113331                  | 16.1                | 219                  |
| 121331              | 4.19                | 123331                  | 16.76               | 300                  |
| 122331              | 5.67                | 123331                  | 16.76               | 196                  |
| 131331              | 3.91                | 133331                  | 16.77               | 329                  |
| 132331              | 5.67                | 133331                  | 16.77               | 196                  |
| 211331              | 2.4                 | 213331                  | 10.93               | 355                  |
| 212331              | 3.39                | 213331                  | 10.93               | 222                  |
| 221331              | 2.49                | 223331                  | 9.34                | 275                  |
| 222331              | 3.13                | 223331                  | 9.34                | 198                  |
| 231331              | 2.77                | 233331                  | 14.99               | 441                  |
| 232331              | 2.96                | 233331                  | 14.99               | 406                  |
| 311331              | 2.8                 | 313331                  | 10.33               | 269                  |
| 312331              | 3.35                | 313331                  | 10.33               | 208                  |
| 321331              | 4.55                | 323331                  | 14.91               | 228                  |
| 322331              | 3.36                | 323331                  | 14.91               | 344                  |
| 331331              | 2.8                 | 333331                  | 9.19                | 228                  |
| 332331              | 3.11                | 333331                  | 9.19                | 195                  |

**Supplementary Table S9.** The percentage change in average score  $\langle Z \rangle$  going from an *uncoupled* NFLB-4 topology to a coupled NFLB-4 + IFFL-4 topology. Note: the third digit changes to 1 in each case. The average change overall is +330%.

| NFLB-4 only |                     | NFLB-4 + IFFL-4 |                     | Percentage<br>Change |
|-------------|---------------------|-----------------|---------------------|----------------------|
| Code        | $\langle Z \rangle$ | Code            | $\langle Z \rangle$ |                      |
| 112133      | 2.74                | 111133          | 12.48               | 355                  |
| 113133      | 8.63                | 111133          | 12.48               | 45                   |
| 122133      | 2.68                | 121133          | 11.96               | 346                  |
| 123133      | 10.46               | 121133          | 11.96               | 14                   |
| 132133      | 2.59                | 131133          | 12.57               | 385                  |
| 133133      | 13.2                | 131133          | 12.57               | -5                   |
| 212133      | 2.64                | 211133          | 11.41               | 332                  |
| 213133      | 2.24                | 211133          | 11.41               | 409                  |
| 222133      | 2.64                | 221133          | 13.67               | 418                  |
| 223133      | 2.27                | 221133          | 13.67               | 502                  |
| 232133      | 2.12                | 231133          | 11.27               | 432                  |
| 233133      | 2.43                | 231133          | 11.27               | 364                  |
| 312133      | 2.9                 | 311133          | 13.64               | 370                  |
| 313133      | 2.6                 | 311133          | 13.64               | 425                  |
| 322133      | 3.25                | 321133          | 12.94               | 298                  |
| 323133      | 2.63                | 321133          | 12.94               | 392                  |
| 332133      | 3.22                | 331133          | 12.55               | 290                  |
| 333133      | 1.81                | 331133          | 12.55               | 593                  |



**Supplementary Table S10.** The percentage changes in average score  $\langle Z \rangle$  going from an *uncoupled* IFFL-1 topology to a coupled IFFL-1 + NFLB-1 topology. Note: the first digit changes to 1 in each case. The average change overall is +23%.

| IFFL-1 only |                     | NFLB-1 + IFFL-1 |                     | Percentage<br>Change |
|-------------|---------------------|-----------------|---------------------|----------------------|
| Code        | $\langle Z \rangle$ | Code            | $\langle Z \rangle$ |                      |
| 213131      | 11.43               | 113131          | 16.87               | 48                   |
| 313131      | 13.14               | 113131          | 16.87               | 28                   |
| 213231      | 13.19               | 113231          | 16.26               | 23                   |
| 313231      | 14.73               | 113231          | 16.26               | 10                   |
| 223131      | 15.18               | 123131          | 16.92               | 11                   |
| 323131      | 10.80               | 123131          | 16.92               | 57                   |
| 223231      | 15.25               | 123231          | 17.15               | 12                   |
| 323231      | 15.62               | 123231          | 17.15               | 10                   |
| 233131      | 13.88               | 133131          | 17.68               | 27                   |
| 333131      | 15.49               | 133131          | 17.68               | 14                   |
| 233231      | 14.38               | 133231          | 17.03               | 18                   |
| 333231      | 14.40               | 133231          | 17.03               | 18                   |

**Supplementary Table S11.** The percentage changes in average score  $\langle Z \rangle$  going from an *uncoupled* IFFL-1 topology to a coupled IFFL-1 + NFLB-3 topology. Note: the fourth digit changes to 3 in each case. The average change overall is  $-15\%$ .

| IFFL-1 only |                     | NFLB-3 + IFFL-1 |                     | Percentage Change |
|-------------|---------------------|-----------------|---------------------|-------------------|
| Code        | $\langle Z \rangle$ | Code            | $\langle Z \rangle$ |                   |
| 213131      | 11.43               | 213331          | 10.93               | -4                |
| 213231      | 13.19               | 213331          | 10.93               | -17               |
| 223131      | 15.18               | 223331          | 9.34                | -38               |
| 223231      | 15.25               | 223331          | 9.34                | -39               |
| 233131      | 13.88               | 233331          | 14.99               | 8                 |
| 233231      | 14.38               | 233331          | 14.99               | 4                 |
| 313131      | 13.14               | 313331          | 10.33               | -21               |
| 313231      | 14.73               | 313331          | 10.33               | -30               |
| 323131      | 10.8                | 323331          | 14.91               | 38                |
| 323231      | 15.62               | 323331          | 14.91               | -5                |
| 333131      | 15.49               | 333331          | 9.19                | -41               |
| 333231      | 14.4                | 333331          | 9.19                | -36               |

**Supplementary Table S12.** The percentage changes in average score  $\langle Z \rangle$  going from an *uncoupled* IFFL-1 topology to a coupled IFFL-1 + NFLB-1 + NFLB-3 topology. Note: first digit = 1, fourth digit = 3 in each case. The average change overall is +20%.

| IFFL-1 only |                     | NFLB-1 + NFLB-3<br>+ IFFL-1 |                     | Percentage<br>Change |
|-------------|---------------------|-----------------------------|---------------------|----------------------|
| Code        | $\langle Z \rangle$ | Code                        | $\langle Z \rangle$ |                      |
| 213131      | 11.43               | 113331                      | 16.1                | 41                   |
| 213231      | 13.19               | 113331                      | 16.1                | 22                   |
| 313131      | 13.14               | 113331                      | 16.1                | 23                   |
| 313231      | 14.73               | 113331                      | 16.1                | 9                    |
| 223131      | 15.18               | 123331                      | 16.76               | 10                   |
| 223231      | 15.25               | 123331                      | 16.76               | 10                   |
| 323131      | 10.8                | 123331                      | 16.76               | 55                   |
| 323231      | 15.62               | 123331                      | 16.76               | 7                    |
| 233131      | 13.88               | 133331                      | 16.77               | 21                   |
| 233231      | 14.38               | 133331                      | 16.77               | 17                   |
| 333131      | 15.49               | 133331                      | 16.77               | 8                    |
| 333231      | 14.4                | 133331                      | 16.77               | 16                   |

**Supplementary Table S13.** The percentage changes in average score  $\langle Z \rangle$  adding an NFLB-3 topology to a coupled IFFL-1 + NFLB-1 topology. Note: fourth digit = 3 in each case. The average change overall is  $-2.6\%$ .

| NFLB-1 + IFFL-1 |                     | NFLB-1 + NFLB-3<br>+ IFFL-1 |                     | Percentage<br>Change |
|-----------------|---------------------|-----------------------------|---------------------|----------------------|
| Code            | $\langle Z \rangle$ | Code                        | $\langle Z \rangle$ |                      |
| 113131          | 16.87               | 113331                      | 16.1                | -4.6                 |
| 113231          | 16.26               | 113331                      | 16.1                | -1.0                 |
| 123131          | 16.92               | 123331                      | 16.76               | -0.9                 |
| 123231          | 17.15               | 123331                      | 16.76               | -2.3                 |
| 133131          | 17.68               | 133331                      | 16.77               | -5.1                 |
| 133231          | 17.03               | 133331                      | 16.77               | -1.5                 |

**Supplementary Table S14.** The percentage changes in average score  $\langle Z \rangle$  adding an NFLB-1 topology to a coupled IFFL-1 + NFLB-3 topology. Note: first digit = 1 in each case. The average change overall is +48%.

| NFLB-3 + IFFL-1 |                     | NFLB-1 + NFLB-3<br>+ IFFL-1 |                     | Percentage<br>Change |
|-----------------|---------------------|-----------------------------|---------------------|----------------------|
| Code            | $\langle Z \rangle$ | Code                        | $\langle Z \rangle$ |                      |
| 213331          | 10.93               | 113331                      | 16.1                | 47                   |
| 313331          | 10.33               | 113331                      | 16.1                | 56                   |
| 223331          | 9.34                | 123331                      | 16.76               | 79                   |
| 323331          | 14.91               | 123331                      | 16.76               | 12                   |
| 233331          | 14.99               | 133331                      | 16.77               | 12                   |
| 333331          | 9.19                | 133331                      | 16.77               | 82                   |

**Supplementary Table S15.** The percentage changes in average score  $\langle Z \rangle$  going from an *uncoupled* IFFL-4 topology to a coupled IFFL-4 + NFLB-2 topology. Note: first digit = 3 in each case. The average change overall is +3.8%.

| IFFL-4 only |                     | NFLB-2 + IFFL-4 |                     | Percentage Change |
|-------------|---------------------|-----------------|---------------------|-------------------|
| Code        | $\langle Z \rangle$ | Code            | $\langle Z \rangle$ |                   |
| 111233      | 11.45               | 311233          | 12.73               | 11.2              |
| 211233      | 11.89               | 311233          | 12.73               | 7.1               |
| 111333      | 14.04               | 311333          | 11.81               | -15.9             |
| 211333      | 13.25               | 311333          | 11.81               | -10.9             |
| 121233      | 12.02               | 321233          | 12.9                | 7.3               |
| 221233      | 11.96               | 321233          | 12.9                | 7.9               |
| 121333      | 13.47               | 321333          | 12.53               | -7.0              |
| 221333      | 12.15               | 321333          | 12.53               | 3.1               |
| 131233      | 13.64               | 331233          | 14.36               | 5.3               |
| 231233      | 12.19               | 331233          | 14.36               | 17.8              |
| 131333      | 13.55               | 331333          | 14.34               | 5.8               |
| 231333      | 12.61               | 331333          | 14.34               | 13.7              |

**Supplementary Table S16.** The percentage changes in average score  $\langle Z \rangle$  going from an *uncoupled* IFFL-4 topology to a coupled IFFL-4 + NFLB-4 topology. Note: fourth digit = 1 in each case. The average change overall is -3.2%.

| IFFL-4 only |                     | NFLB-4 + IFFL-4 |                     | Percentage Change |
|-------------|---------------------|-----------------|---------------------|-------------------|
| Code        | $\langle Z \rangle$ | Code            | $\langle Z \rangle$ |                   |
| 111233      | 11.45               | 111133          | 12.48               | 9.0               |
| 111333      | 14.04               | 111133          | 12.48               | -11.1             |
| 211233      | 11.89               | 211133          | 11.41               | -4.0              |
| 211333      | 13.25               | 211133          | 11.41               | -13.9             |
| 121233      | 12.02               | 121133          | 11.96               | -0.5              |
| 121333      | 13.47               | 121133          | 11.96               | -11.2             |
| 221233      | 11.96               | 221133          | 13.67               | 14.3              |
| 221333      | 12.15               | 221133          | 13.67               | 12.5              |
| 131233      | 13.64               | 131133          | 12.57               | -7.8              |
| 131333      | 13.55               | 131133          | 12.57               | -7.2              |
| 231233      | 12.19               | 231133          | 11.27               | -7.5              |
| 231333      | 12.61               | 231133          | 11.27               | -10.6             |

**Supplementary Table S17.** The percentage changes in average score  $\langle Z \rangle$  going from an *uncoupled* IFFL-4 topology to a coupled IFFL-4 + NFLB-2 + NFLB-4 topology. Note: first digit = 3, fourth digit = 1 in each case. The average change overall is +3.3%.

| IFFL-4 only |                     | NFLB-2 + NFLB-4<br>+ IFFL-4 |                     | Percentage<br>Change |
|-------------|---------------------|-----------------------------|---------------------|----------------------|
| Code        | $\langle Z \rangle$ | Code                        | $\langle Z \rangle$ |                      |
| 111233      | 11.45               | 311133                      | 13.64               | 19.1                 |
| 211233      | 11.89               | 311133                      | 13.64               | 14.7                 |
| 111333      | 14.04               | 311133                      | 13.64               | -2.8                 |
| 211333      | 13.25               | 311133                      | 13.64               | 2.9                  |
| 121233      | 12.02               | 321133                      | 12.94               | 7.7                  |
| 221233      | 11.96               | 321133                      | 12.94               | 8.2                  |
| 121333      | 13.47               | 321133                      | 12.94               | -3.9                 |
| 221333      | 12.15               | 321133                      | 12.94               | 6.5                  |
| 131233      | 13.64               | 331133                      | 12.55               | -8.0                 |
| 231233      | 12.19               | 331133                      | 12.55               | 3.0                  |
| 131333      | 13.55               | 331133                      | 12.55               | -7.4                 |
| 231333      | 12.61               | 331133                      | 12.55               | -0.5                 |



**Supplementary Table S18.** The percentage changes in average score  $\langle Z \rangle$  adding an NFLB-4 topology to a coupled IFFL-4 + NFLB-2 topology. Note: fourth digit = 1 in each case. The average change overall is +0.2%.

| NFLB-2 + IFFL-4 |                     | NFLB-2 + NFLB-4 + IFFL-4 |                     | Percentage Change |
|-----------------|---------------------|--------------------------|---------------------|-------------------|
| Code            | $\langle Z \rangle$ | Code                     | $\langle Z \rangle$ |                   |
| 311233          | 12.73               | 311133                   | 13.64               | 7.1               |
| 311333          | 11.81               | 311133                   | 13.64               | 15.5              |
| 321233          | 12.9                | 321133                   | 12.94               | 0.3               |
| 321333          | 12.53               | 321133                   | 12.94               | 3.3               |
| 331233          | 14.36               | 331133                   | 12.55               | -12.6             |
| 331333          | 14.34               | 331133                   | 12.55               | -12.5             |

**Supplementary Table S19.** The percentage changes in average score  $\langle Z \rangle$  adding an NFLB-2 topology to a coupled IFFL-4 + NFLB-4 topology. Note: first digit = 3 in each case. The average change overall is +7.1%.

| NFLB-4 + IFFL-4 |                     | NFLB-2 + NFLB-4 + IFFL-4 |                     | Percentage Change |
|-----------------|---------------------|--------------------------|---------------------|-------------------|
| Code            | $\langle Z \rangle$ | Code                     | $\langle Z \rangle$ |                   |
| 111133          | 12.48               | 311133                   | 13.64               | 9.3               |
| 211133          | 11.41               | 311133                   | 13.64               | 19.5              |
| 121133          | 11.96               | 321133                   | 12.94               | 8.2               |
| 221133          | 13.67               | 321133                   | 12.94               | -5.3              |
| 131133          | 12.57               | 331133                   | 12.55               | -0.2              |
| 231133          | 11.27               | 331133                   | 12.55               | 11.4              |

**Supplementary Table S20.** Mean values of the six interaction coefficients from all high-scoring samples of IFFL-1 topologies.

| IFFL-1<br>Code | Interaction Coefficients |               |               |               |               |               |
|----------------|--------------------------|---------------|---------------|---------------|---------------|---------------|
|                | $\omega_{12}$            | $\omega_{13}$ | $\omega_{21}$ | $\omega_{23}$ | $\omega_{31}$ | $\omega_{32}$ |
| 113131         | -0.98                    | -0.14         | 0.89          | -0.20         | 0.97          | -0.96         |
| 113231         | -1.00                    | -0.13         | 0.93          | 0.00          | 0.95          | -0.98         |
| 113331         | -0.97                    | -0.13         | 0.85          | 0.26          | 0.97          | -0.88         |
| 123131         | -0.99                    | 0.00          | 0.88          | -0.17         | 0.97          | -0.95         |
| 123231         | -0.99                    | 0.00          | 0.89          | 0.00          | 0.97          | -0.96         |
| 123331         | -1.00                    | 0.00          | 0.95          | 0.16          | 0.97          | -0.99         |
| 133131         | -0.92                    | 0.52          | 0.82          | -0.16         | 0.97          | -0.63         |
| 133231         | -0.85                    | 0.62          | 0.54          | 0.00          | 0.97          | -0.90         |
| 133331         | -0.84                    | 0.50          | 0.85          | 0.30          | 0.97          | -0.64         |
| 213131         | 0.00                     | -0.13         | 0.93          | -0.29         | 0.95          | -0.97         |
| 213231         | 0.00                     | -0.16         | 0.92          | 0.00          | 0.96          | -0.98         |
| 213331         | 0.00                     | -0.19         | 0.56          | 0.17          | 0.66          | -0.96         |
| 223131         | 0.00                     | 0.00          | 0.90          | -0.34         | 0.96          | -0.98         |
| 223231         | 0.00                     | 0.00          | 0.89          | 0.00          | 0.96          | -0.98         |
| 223331         | 0.00                     | 0.00          | 0.52          | 0.79          | 0.97          | -0.95         |
| 233131         | 0.00                     | 0.27          | 0.90          | -0.28         | 0.95          | -0.97         |
| 233231         | 0.00                     | 0.20          | 0.92          | 0.00          | 0.97          | -0.98         |
| 233331         | 0.00                     | 0.29          | 0.91          | 0.34          | 0.97          | -0.98         |
| 313131         | 0.20                     | -0.15         | 0.91          | -0.33         | 0.96          | -0.97         |
| 313231         | 0.27                     | -0.23         | 0.92          | 0.00          | 0.97          | -0.98         |
| 313331         | 0.15                     | -0.21         | 0.58          | 0.24          | 0.68          | -0.96         |
| 323131         | 0.12                     | 0.00          | 0.48          | -0.20         | 0.64          | -0.95         |
| 323231         | 0.33                     | 0.00          | 0.92          | 0.00          | 0.97          | -0.98         |
| 323331         | 0.27                     | 0.00          | 0.91          | 0.19          | 0.97          | -0.98         |
| 333131         | 0.18                     | 0.38          | 0.90          | -0.25         | 0.96          | -0.98         |
| 333231         | 0.27                     | 0.36          | 0.92          | 0.00          | 0.97          | -0.98         |
| 333331         | 0.23                     | 0.30          | 0.62          | 0.37          | 0.68          | -0.96         |

Red, the  $\omega_{ij}$ 's for the three links of the underlying IFFL-1; blue, the  $\omega_{12}$ 's in the NFLB-1 cases; purple, the  $\omega_{23}$ 's in the NFLB-3 cases.

**Supplementary Table 21.** Mean values of the six interaction coefficients from all high-scoring samples of IFFL-4 topologies.

| IFFL-4<br>Code | Interaction Coefficients |               |               |               |               |               |
|----------------|--------------------------|---------------|---------------|---------------|---------------|---------------|
|                | $\omega_{12}$            | $\omega_{13}$ | $\omega_{21}$ | $\omega_{23}$ | $\omega_{31}$ | $\omega_{32}$ |
| 111133         | -0.30                    | -0.22         | -0.87         | -0.21         | 0.95          | 0.96          |
| 111233         | -0.39                    | -0.16         | -0.86         | 0.00          | 0.95          | 0.96          |
| 111333         | -0.43                    | -0.14         | -0.86         | 0.25          | 0.94          | 0.96          |
| 121133         | -0.29                    | 0.00          | -0.88         | -0.26         | 0.95          | 0.97          |
| 121233         | -0.27                    | 0.00          | -0.88         | 0.00          | 0.96          | 0.97          |
| 121333         | -0.48                    | 0.00          | -0.83         | 0.22          | 0.93          | 0.96          |
| 131133         | -0.16                    | 0.30          | -0.90         | -0.24         | 0.95          | 0.97          |
| 131233         | -0.31                    | 0.47          | -0.89         | 0.00          | 0.95          | 0.97          |
| 131333         | -0.50                    | 0.38          | -0.89         | 0.14          | 0.94          | 0.97          |
| 211133         | 0.00                     | -0.21         | -0.88         | -0.25         | 0.96          | 0.97          |
| 211233         | 0.00                     | -0.16         | -0.87         | 0.00          | 0.96          | 0.96          |
| 211333         | 0.00                     | -0.21         | -0.88         | 0.25          | 0.95          | 0.96          |
| 221133         | 0.00                     | 0.00          | -0.90         | -0.17         | 0.96          | 0.97          |
| 221233         | 0.00                     | 0.00          | -0.88         | 0.00          | 0.95          | 0.97          |
| 221333         | 0.00                     | 0.00          | -0.85         | 0.21          | 0.94          | 0.96          |
| 231133         | 0.00                     | 0.30          | -0.87         | -0.15         | 0.95          | 0.97          |
| 231233         | 0.00                     | 0.46          | -0.82         | 0.00          | 0.94          | 0.96          |
| 231333         | 0.00                     | 0.37          | -0.87         | 0.20          | 0.95          | 0.96          |
| 311133         | 0.88                     | -0.13         | -0.81         | -0.18         | 0.95          | 0.66          |
| 311233         | 0.23                     | -0.15         | -0.83         | 0.00          | 0.95          | 0.95          |
| 311333         | 0.15                     | -0.27         | -0.84         | 0.14          | 0.95          | 0.96          |
| 321133         | 0.83                     | 0.00          | -0.77         | -0.49         | 0.94          | 0.70          |
| 321233         | 0.90                     | 0.00          | -0.82         | 0.00          | 0.95          | 0.67          |
| 321333         | 0.85                     | 0.00          | -0.84         | 0.18          | 0.94          | 0.61          |
| 331133         | 0.61                     | 0.34          | -0.82         | -0.31         | 0.95          | 0.71          |
| 331233         | 0.83                     | 0.29          | -0.83         | 0.00          | 0.94          | 0.57          |
| 331333         | 0.77                     | 0.45          | -0.82         | 0.15          | 0.94          | 0.59          |

Green, the  $\omega_{ij}$ 's for the three links of the underlying IFFL-4; blue, the  $\omega_{12}$ 's in the NFLB-2 cases; purple, the  $\omega_{23}$ 's in the NFLB-4 cases.
